# Supplementary material
Source: ML conference proceedings conference paper supplement (https://openreview.net/forum?id=psOWQZbI6Z)

# Balanced Accuracy

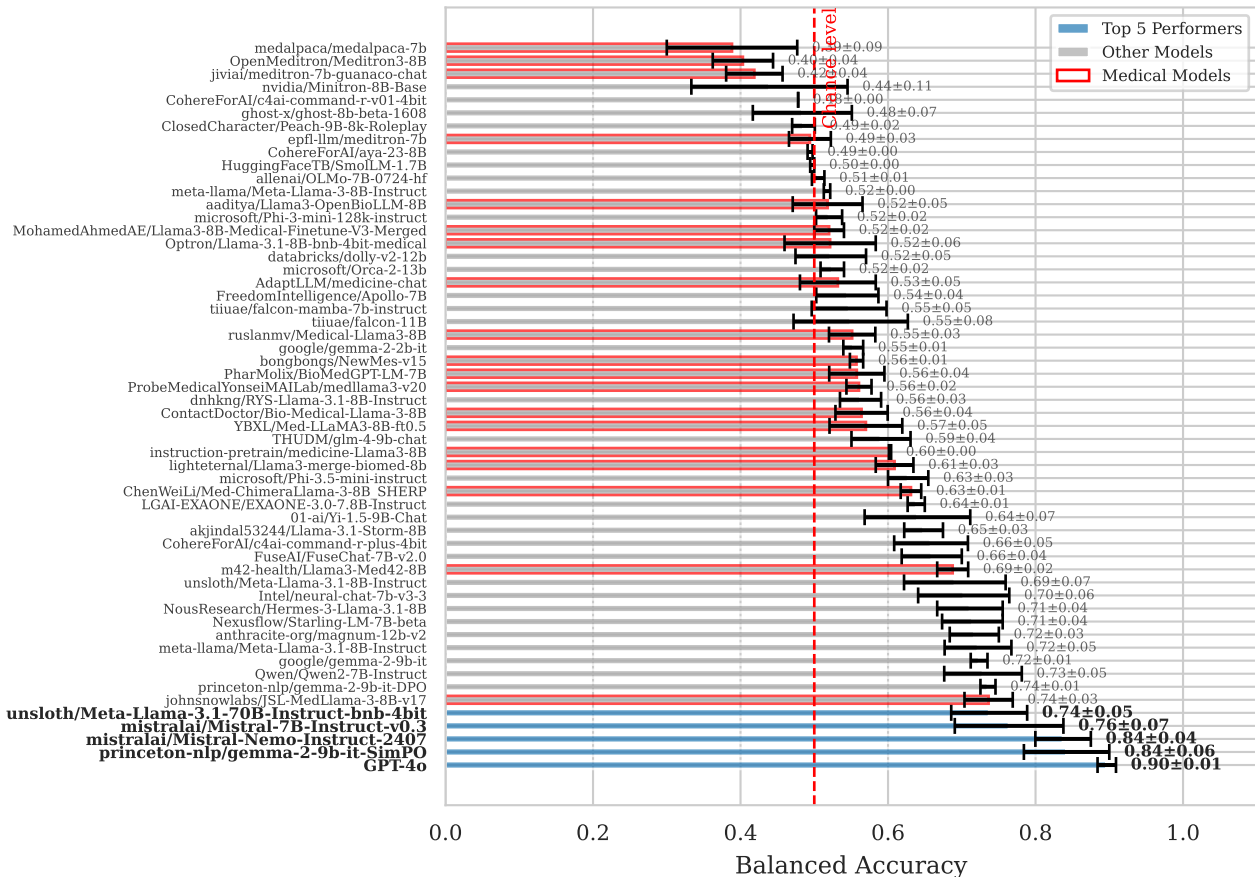

# Precision

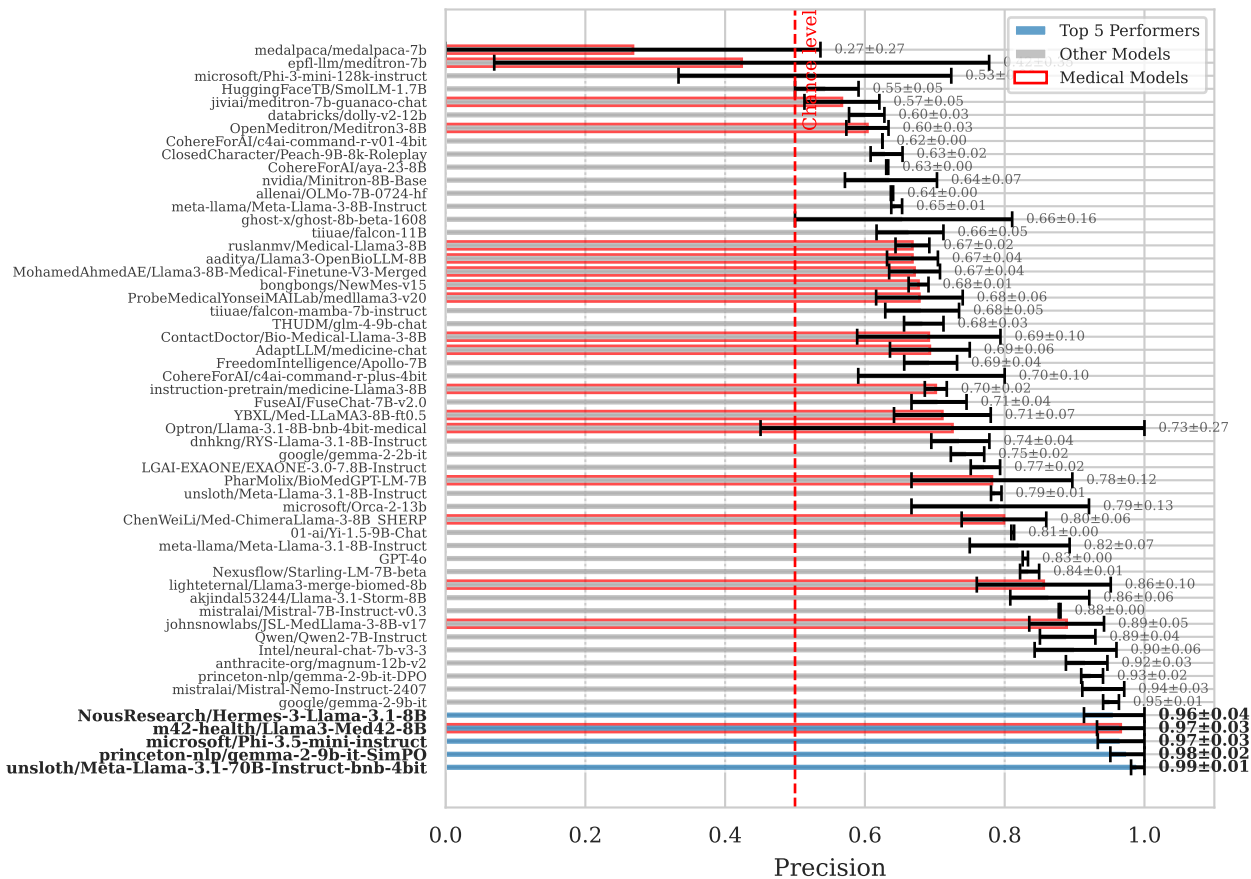

Recall

Model

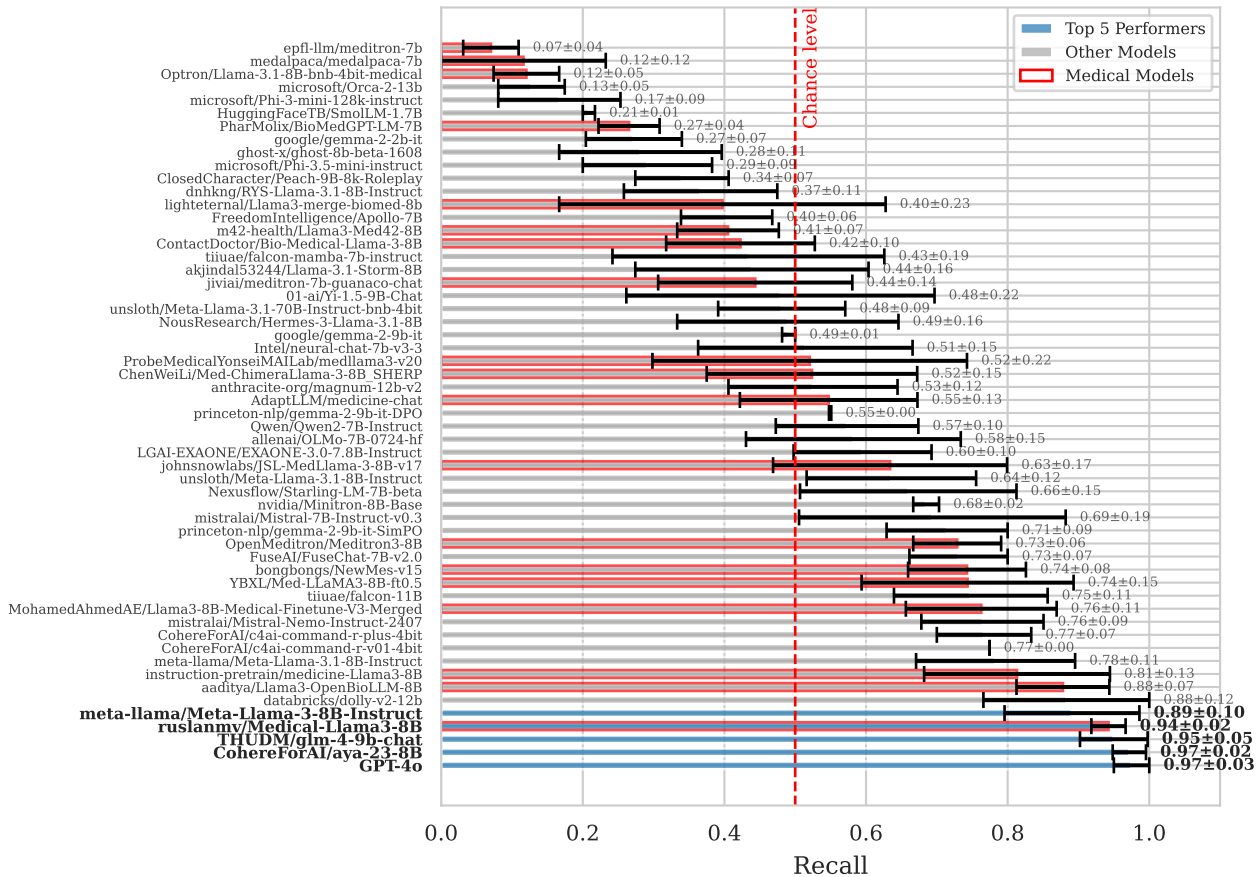

F1 Score

Top 5 Performers  
Other Models  
Medical Models

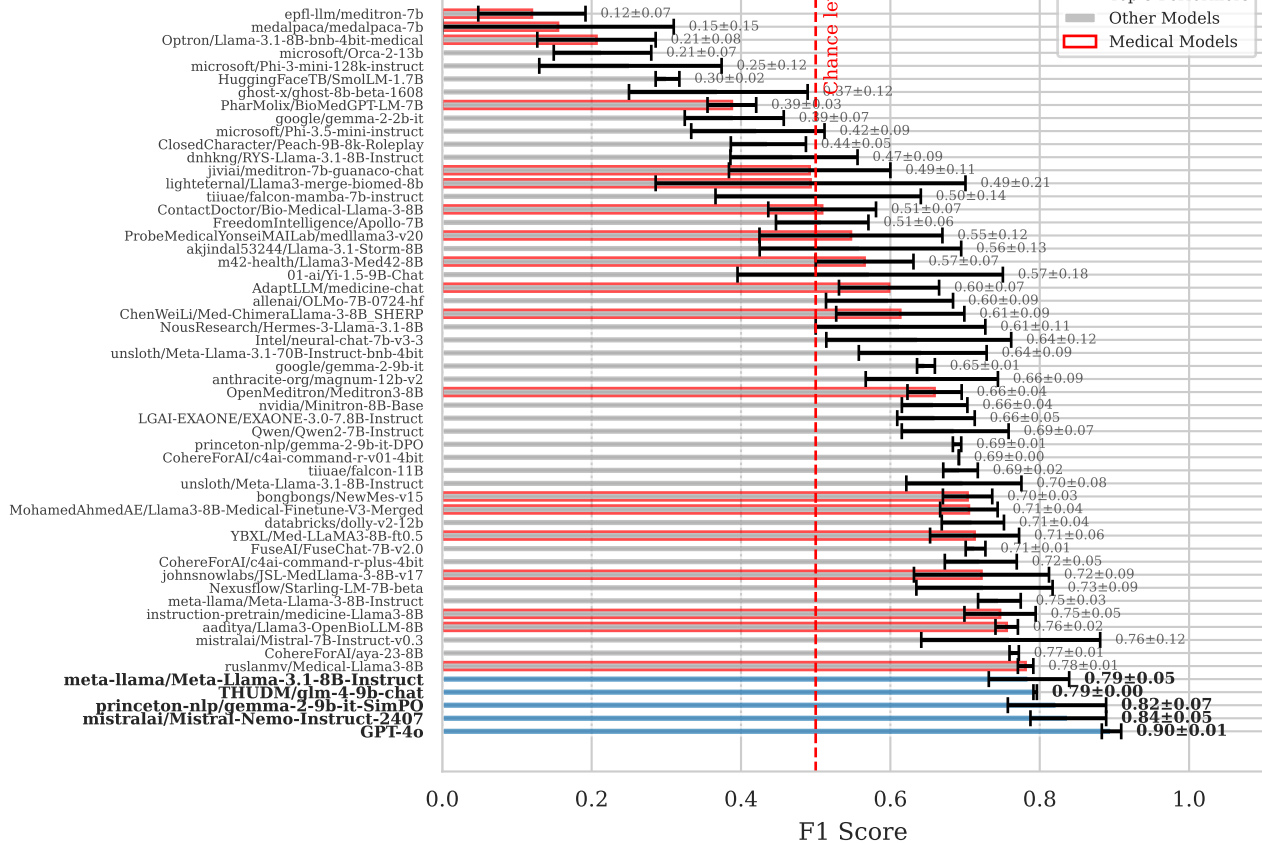

Receiver Operating Characteristic (ROC) Curve

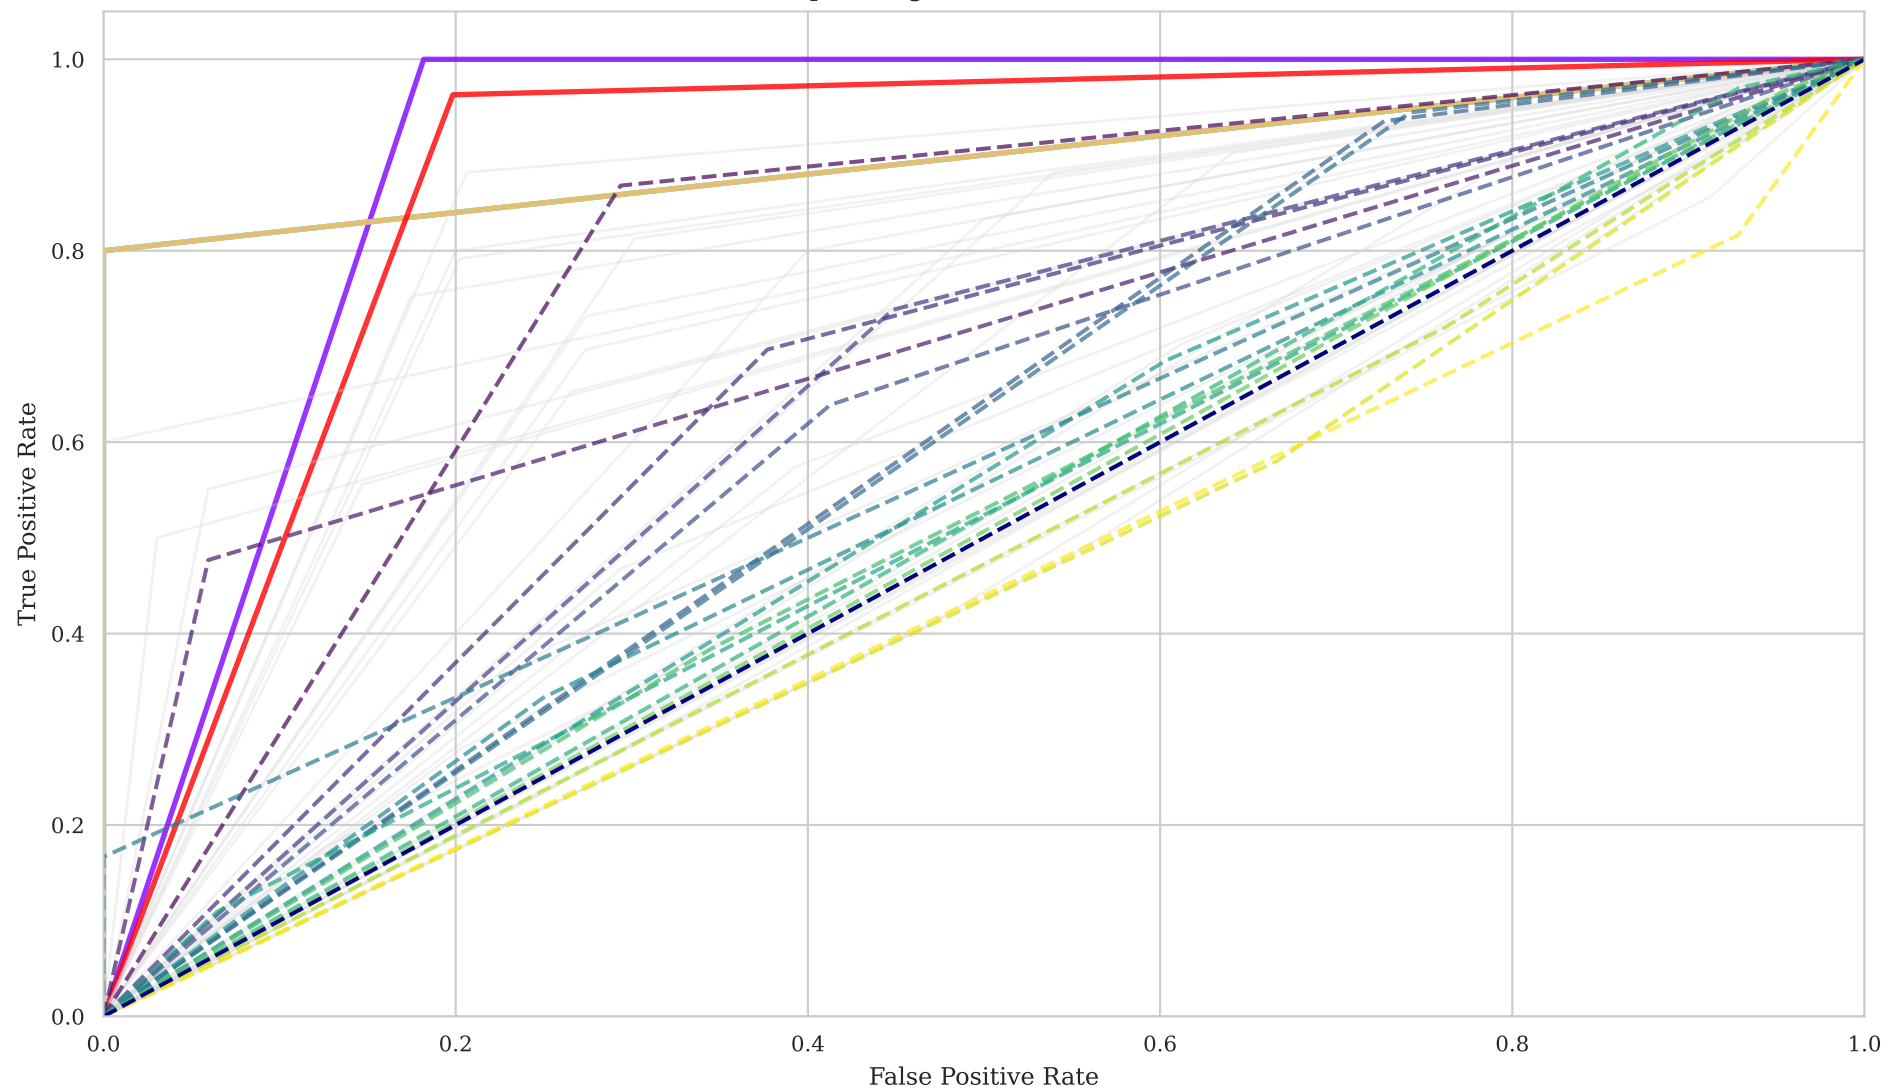

|                                                  |                                                    |                                                                |
|--------------------------------------------------|----------------------------------------------------|----------------------------------------------------------------|
| GPT-4o (AUC=0.91)                                | ChenWeiLi/Med-ChimeraLlama-3-8B_SHERP (AUC=0.65)   | YBXL/Med-LLaMA3-8B-ft0.5 (AUC=0.52)                            |
| Qwen/Qwen2-7B-Instruct (AUC=0.90)                | ContactDoctor/Bio-Medical-Llama-3-8B (AUC=0.61)    | medalpaca/medalpaca-7b (AUC=0.52)                              |
| meta-llama/Meta-Llama-3.1-8B-Instruct (AUC=0.90) | ruslanmv/Medical-Llama3-8B (AUC=0.60)              | MohamedAhmedAE/Llama3-8B-Medical-Finetune-V3-Merged (AUC=0.51) |
| princeton-nlp/gemma-2-9b-it-SimPO (AUC=0.90)     | instruction-pretrain/medicine-Llama3-8B (AUC=0.60) | aaditya/Llama3-OpenBioLLM-8B (AUC=0.50)                        |
| mistralai/Mistral-Nemo-Instruct-2407 (AUC=0.88)  | Optron/Llama-3.1-8B-bnb-4bit-medical (AUC=0.58)    | AdaptLLM/medicine-chat (AUC=0.48)                              |
| johnsnowlabs/JSL-MedLlama-3-8B-v17 (AUC=0.79)    | PharMolix/BioMedGPT-LM-7B (AUC=0.54)               | jiviai/meditron-7b-guanaco-chat (AUC=0.46)                     |
| m42-health/Llama3-Med42-8B (AUC=0.71)            | ProbeMedicalYonseiMAILab/medllama3-v20 (AUC=0.54)  | OpenMeditron/Meditron3-8B (AUC=0.44)                           |
| lighteternal/Llama3-merge-biomed-8b (AUC=0.66)   | epfl-llm/meditron-7b (AUC=0.52)                    |                                                                |

Precision-Recall Curve

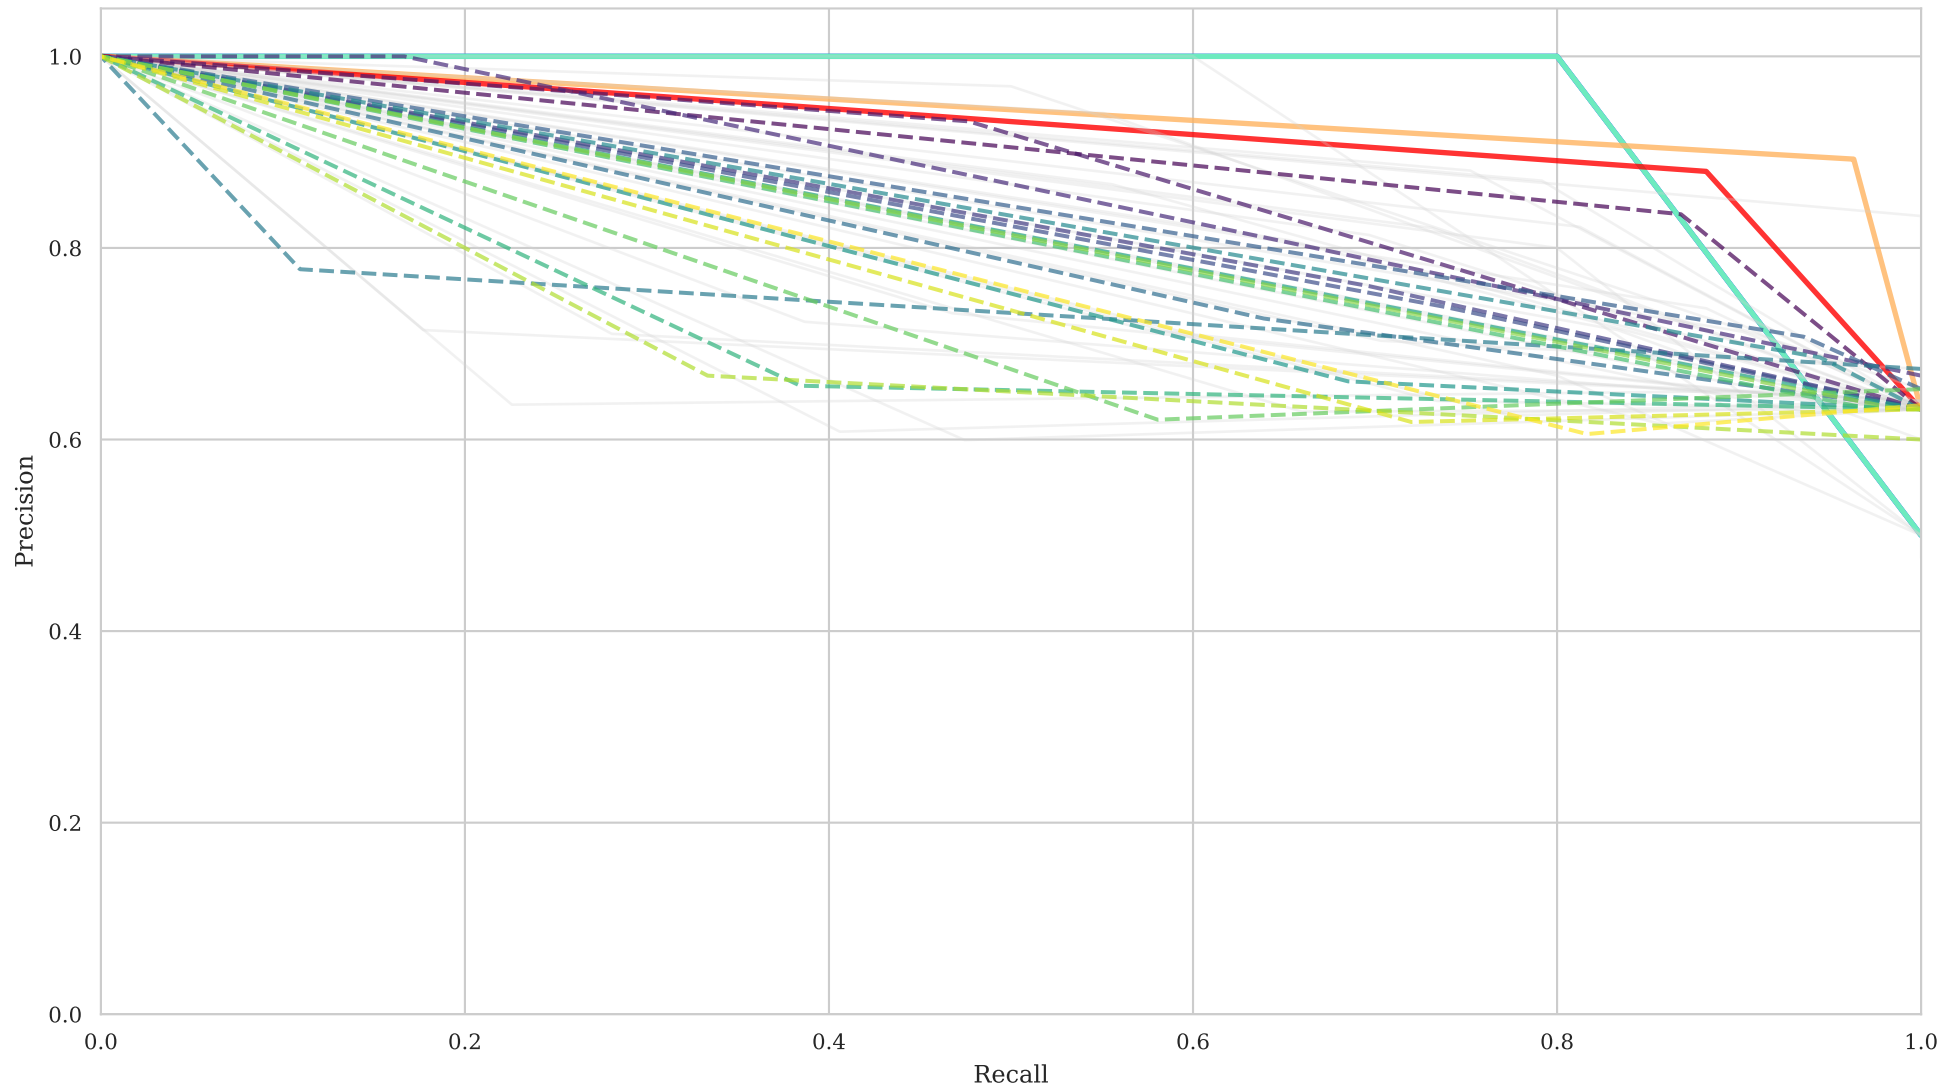

|                                                 |                                                   |                                                               |
|-------------------------------------------------|---------------------------------------------------|---------------------------------------------------------------|
| Qwen/Qwen2-7B-Instruct (AP=0.90)                | lighteternal/Llama3-merge-biomed-8b (AP=0.72)     | medalpaca/medalpaca-7b (AP=0.64)                              |
| meta-llama/Meta-Llama-3.1-8B-Instruct (AP=0.90) | ChenWeiLi/Med-ChimeraLlama-3-8B_SHERP (AP=0.71)   | MohamedAhmedAE/Llama3-8B-Medical-Finetune-V3-Merged (AP=0.63) |
| princeton-nlp/gemma-2-9b-it-SimPO (AP=0.90)     | ruslanmv/Medical-Llama3-8B (AP=0.70)              | jiviai/meditron-7b-guanaco-chat (AP=0.63)                     |
| mistralai/Mistral-Nemo-Instruct-2407 (AP=0.88)  | ContactDoctor/Bio-Medical-Llama-3-8B (AP=0.69)    | aaditya/Llama3-OpenBioLLM-8B (AP=0.63)                        |
| mistralai/Mistral-7B-Instruct-v0.3 (AP=0.85)    | epfl-llm/meditron-7b (AP=0.69)                    | PharMolix/BioMedGPT-LM-7B (AP=0.62)                           |
| johnsnowlabs/JSL-MedLlama-3-8B-v17 (AP=0.81)    | instruction-pretrain/medicine-Llama3-8B (AP=0.68) | AdaptLLM/medicine-chat (AP=0.62)                              |
| m42-health/Llama3-Med42-8B (AP=0.77)            | ProbeMedicalYonseiMAILab/medllama3-v20 (AP=0.65)  | OpenMeditron/Meditron3-8B (AP=0.61)                           |
| Optron/Llama-3.1-8B-bnb-4bit-medical (AP=0.72)  | YBXL/Med-LLaMA3-8B-ft0.5 (AP=0.64)                |                                                               |

Error Rate Comparison

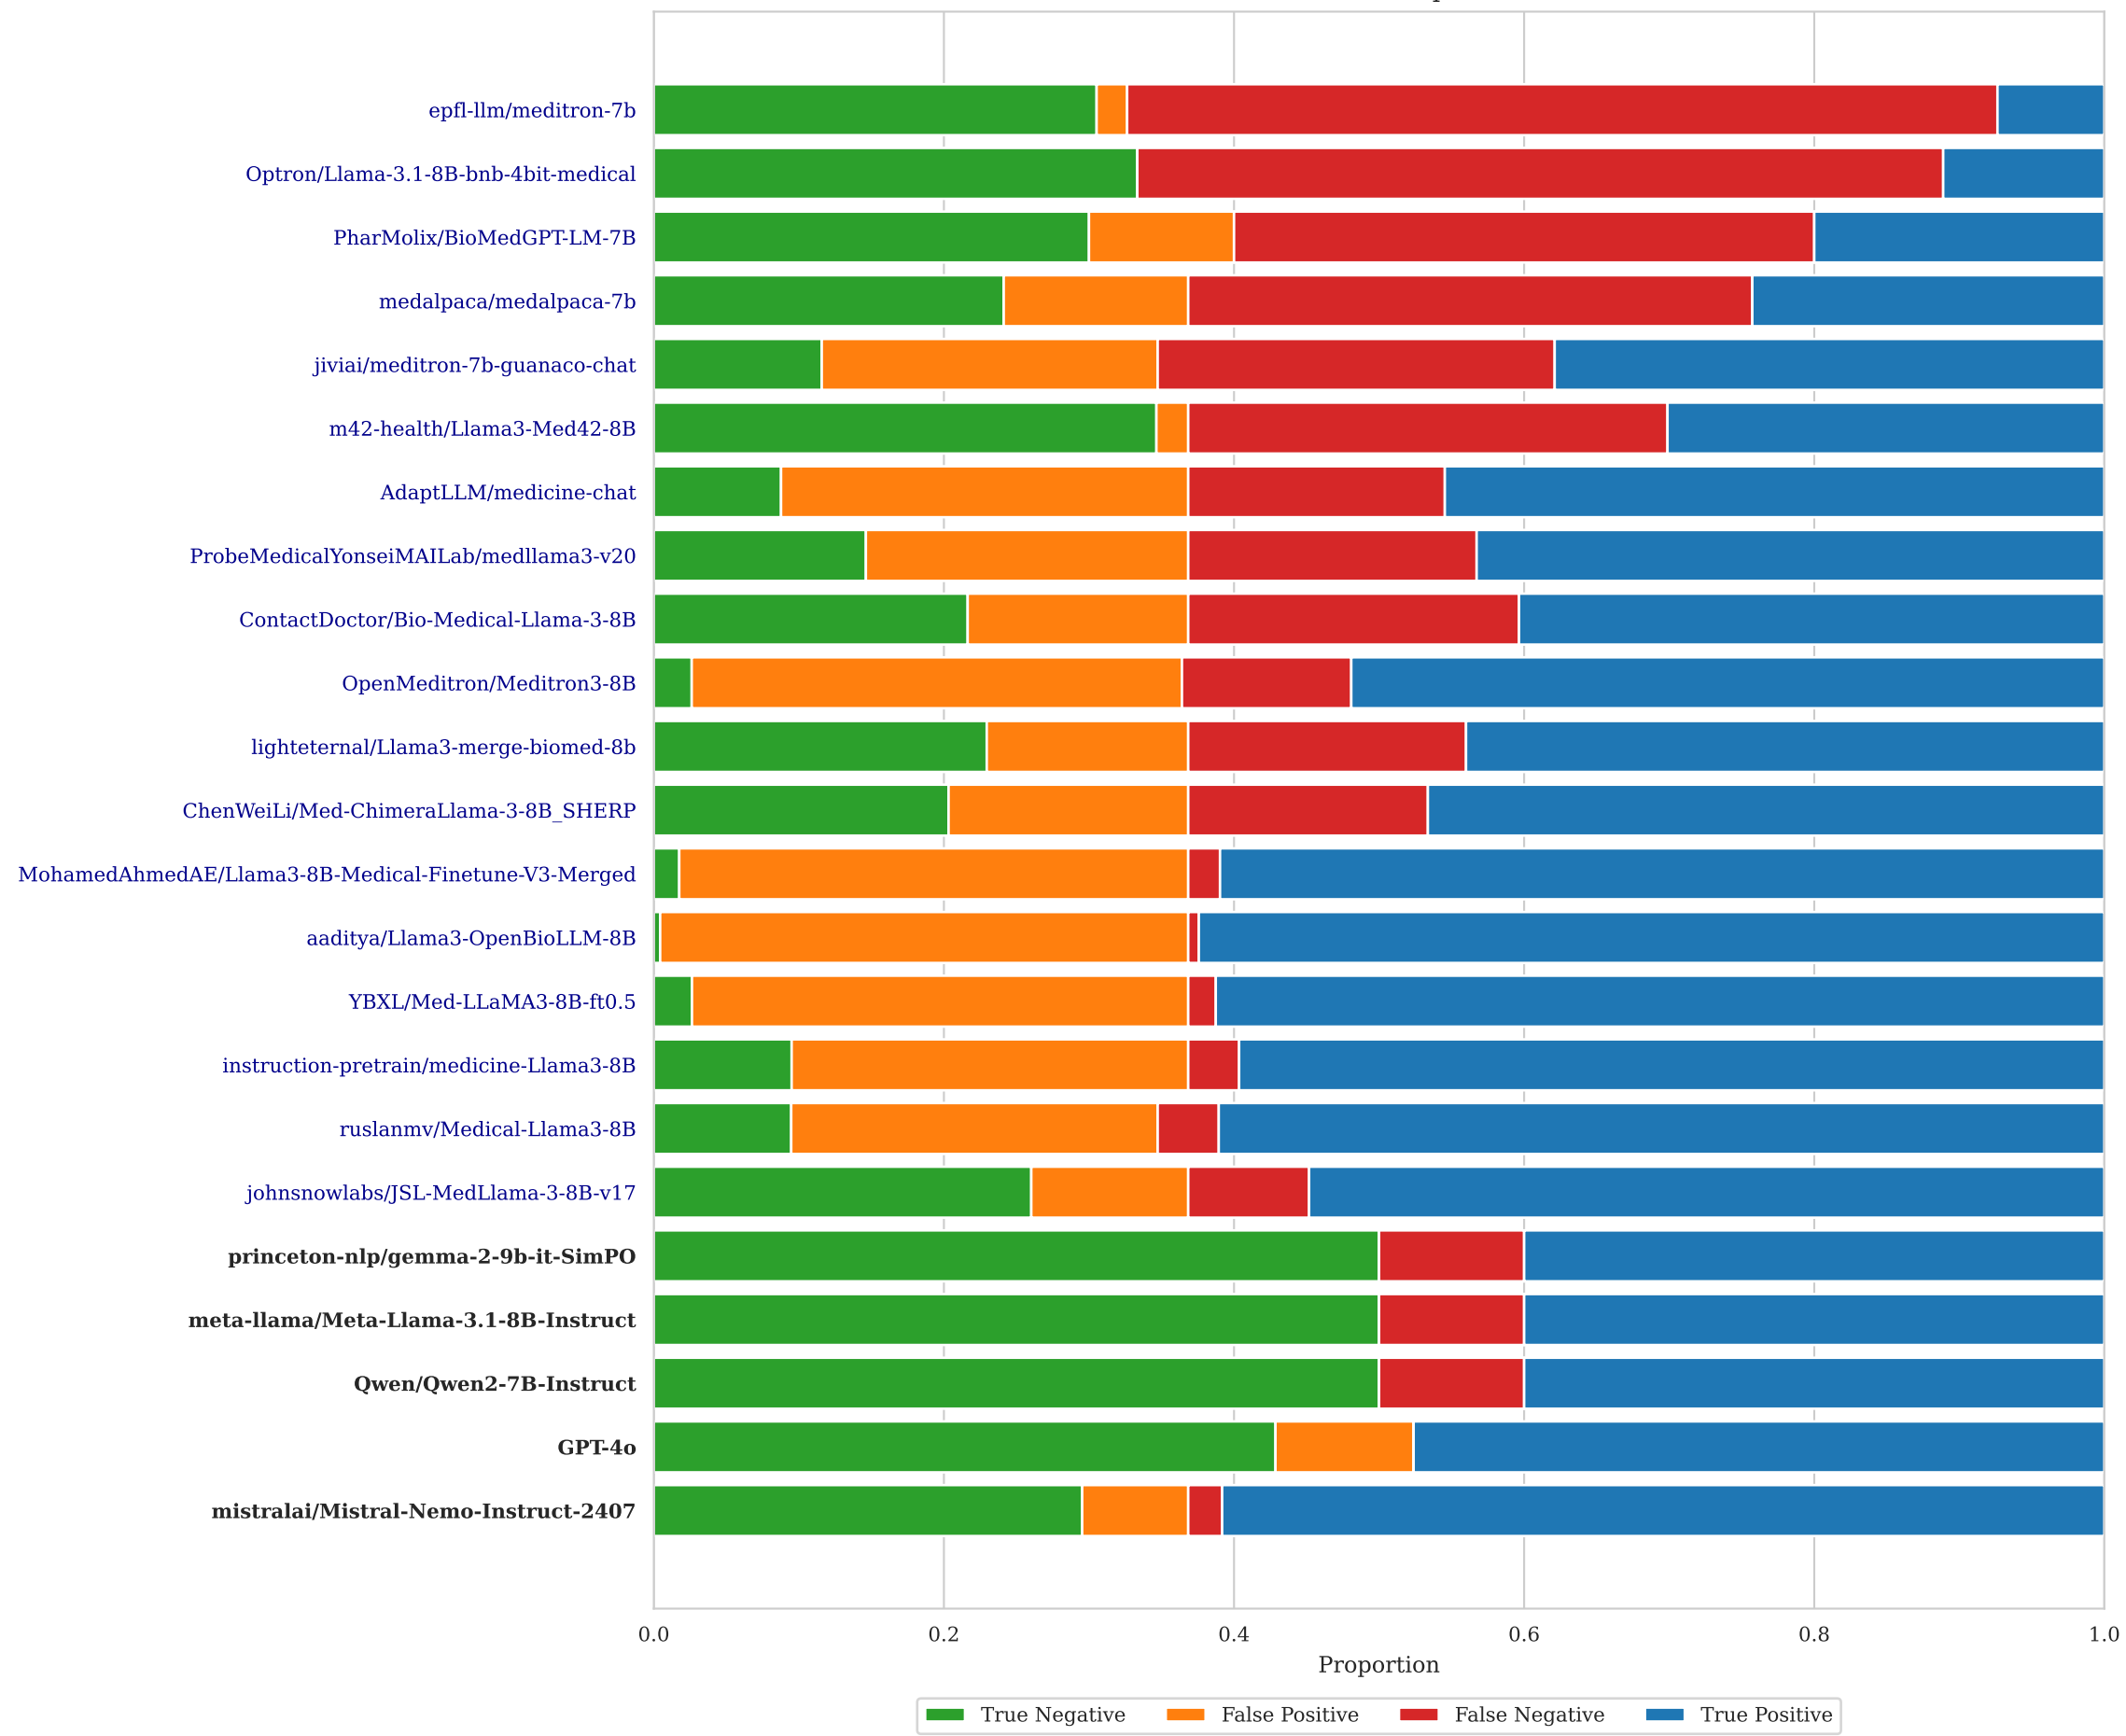

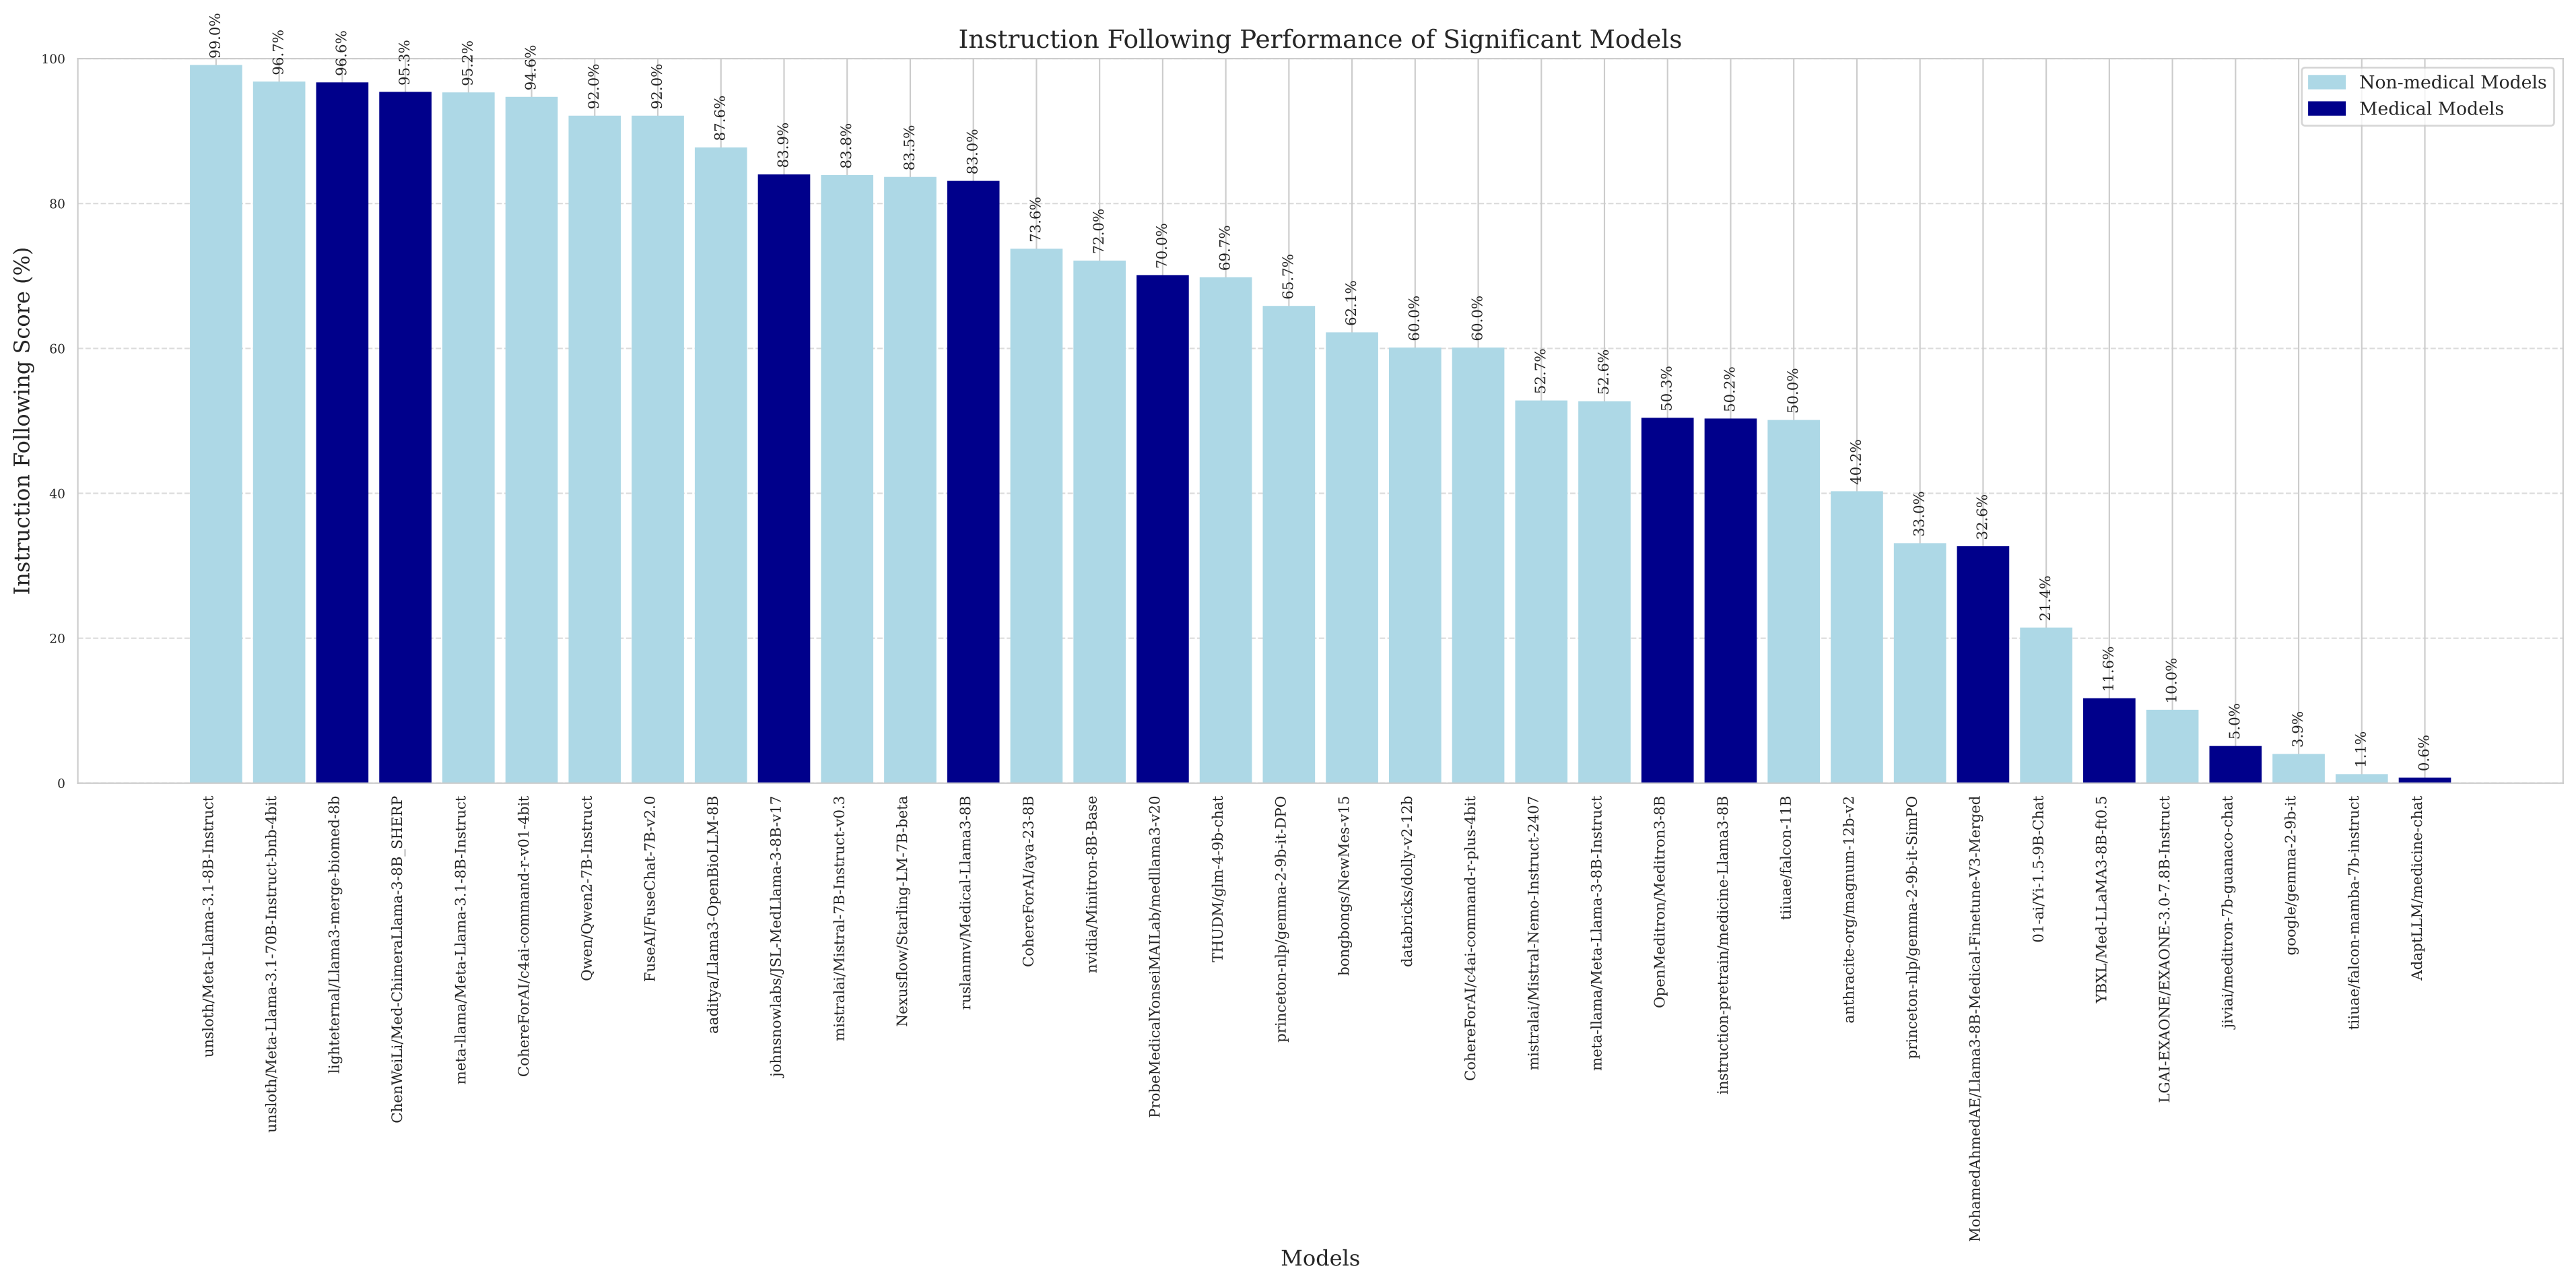



Instruction Following Performance of Top 10 Significant Models

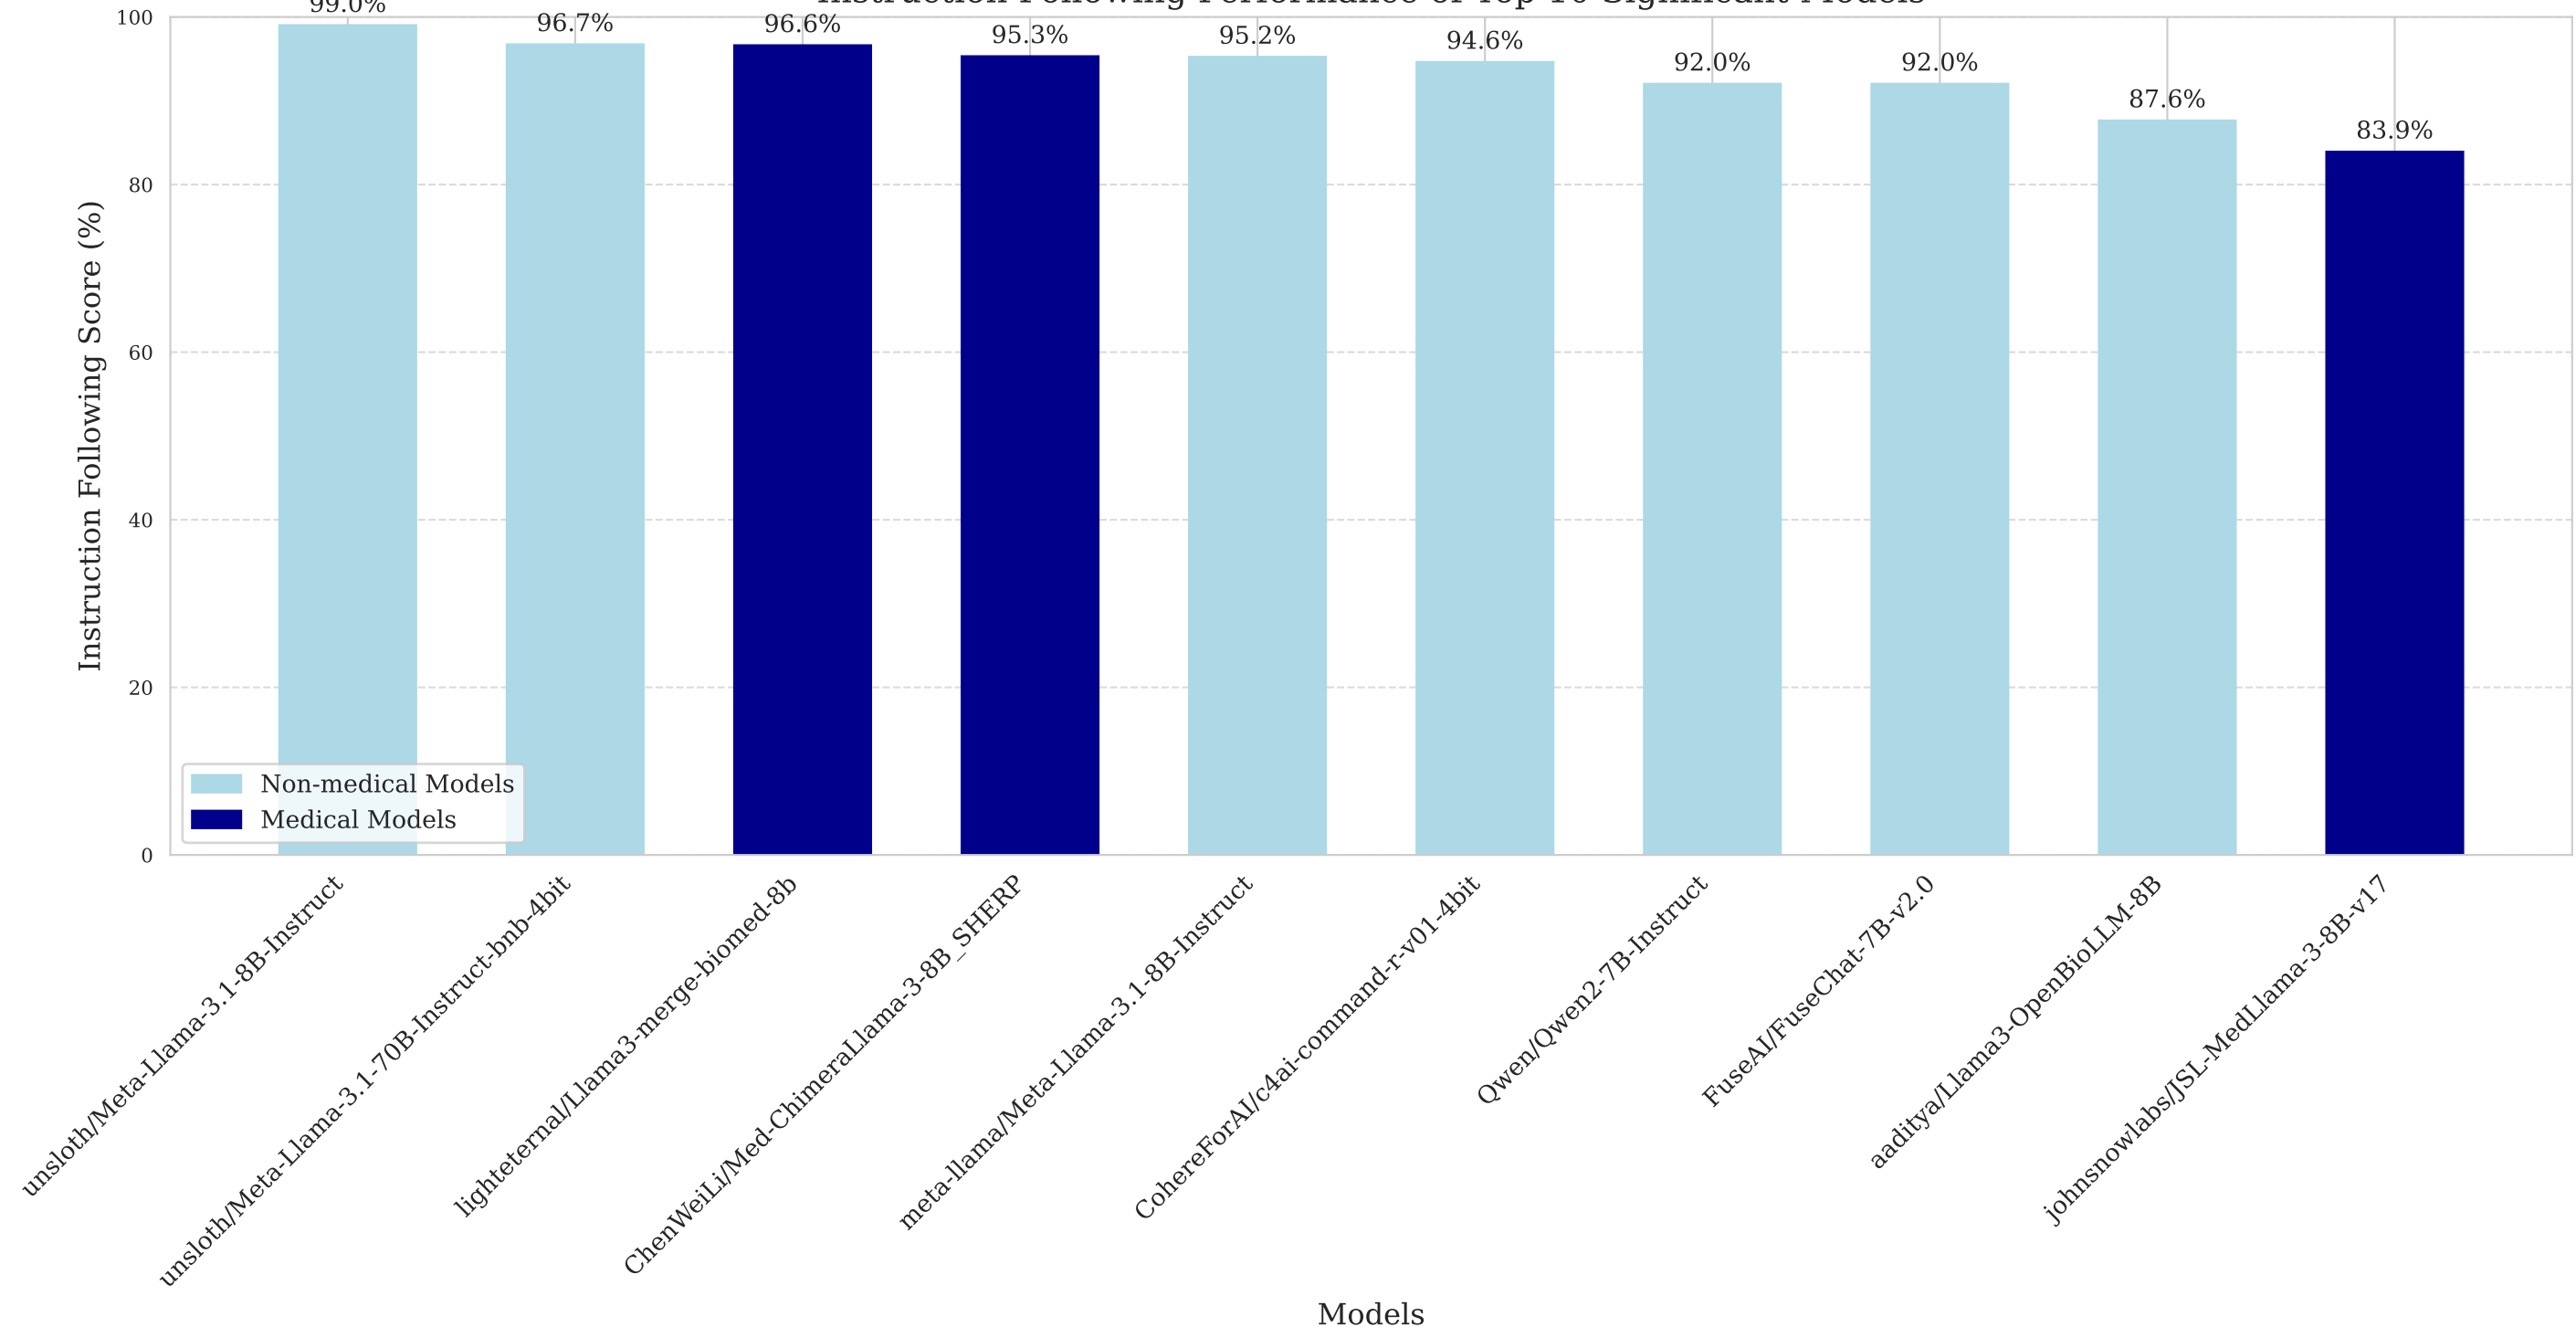

Top 15 Models by Composite Score: F1 Score vs Instruction Following

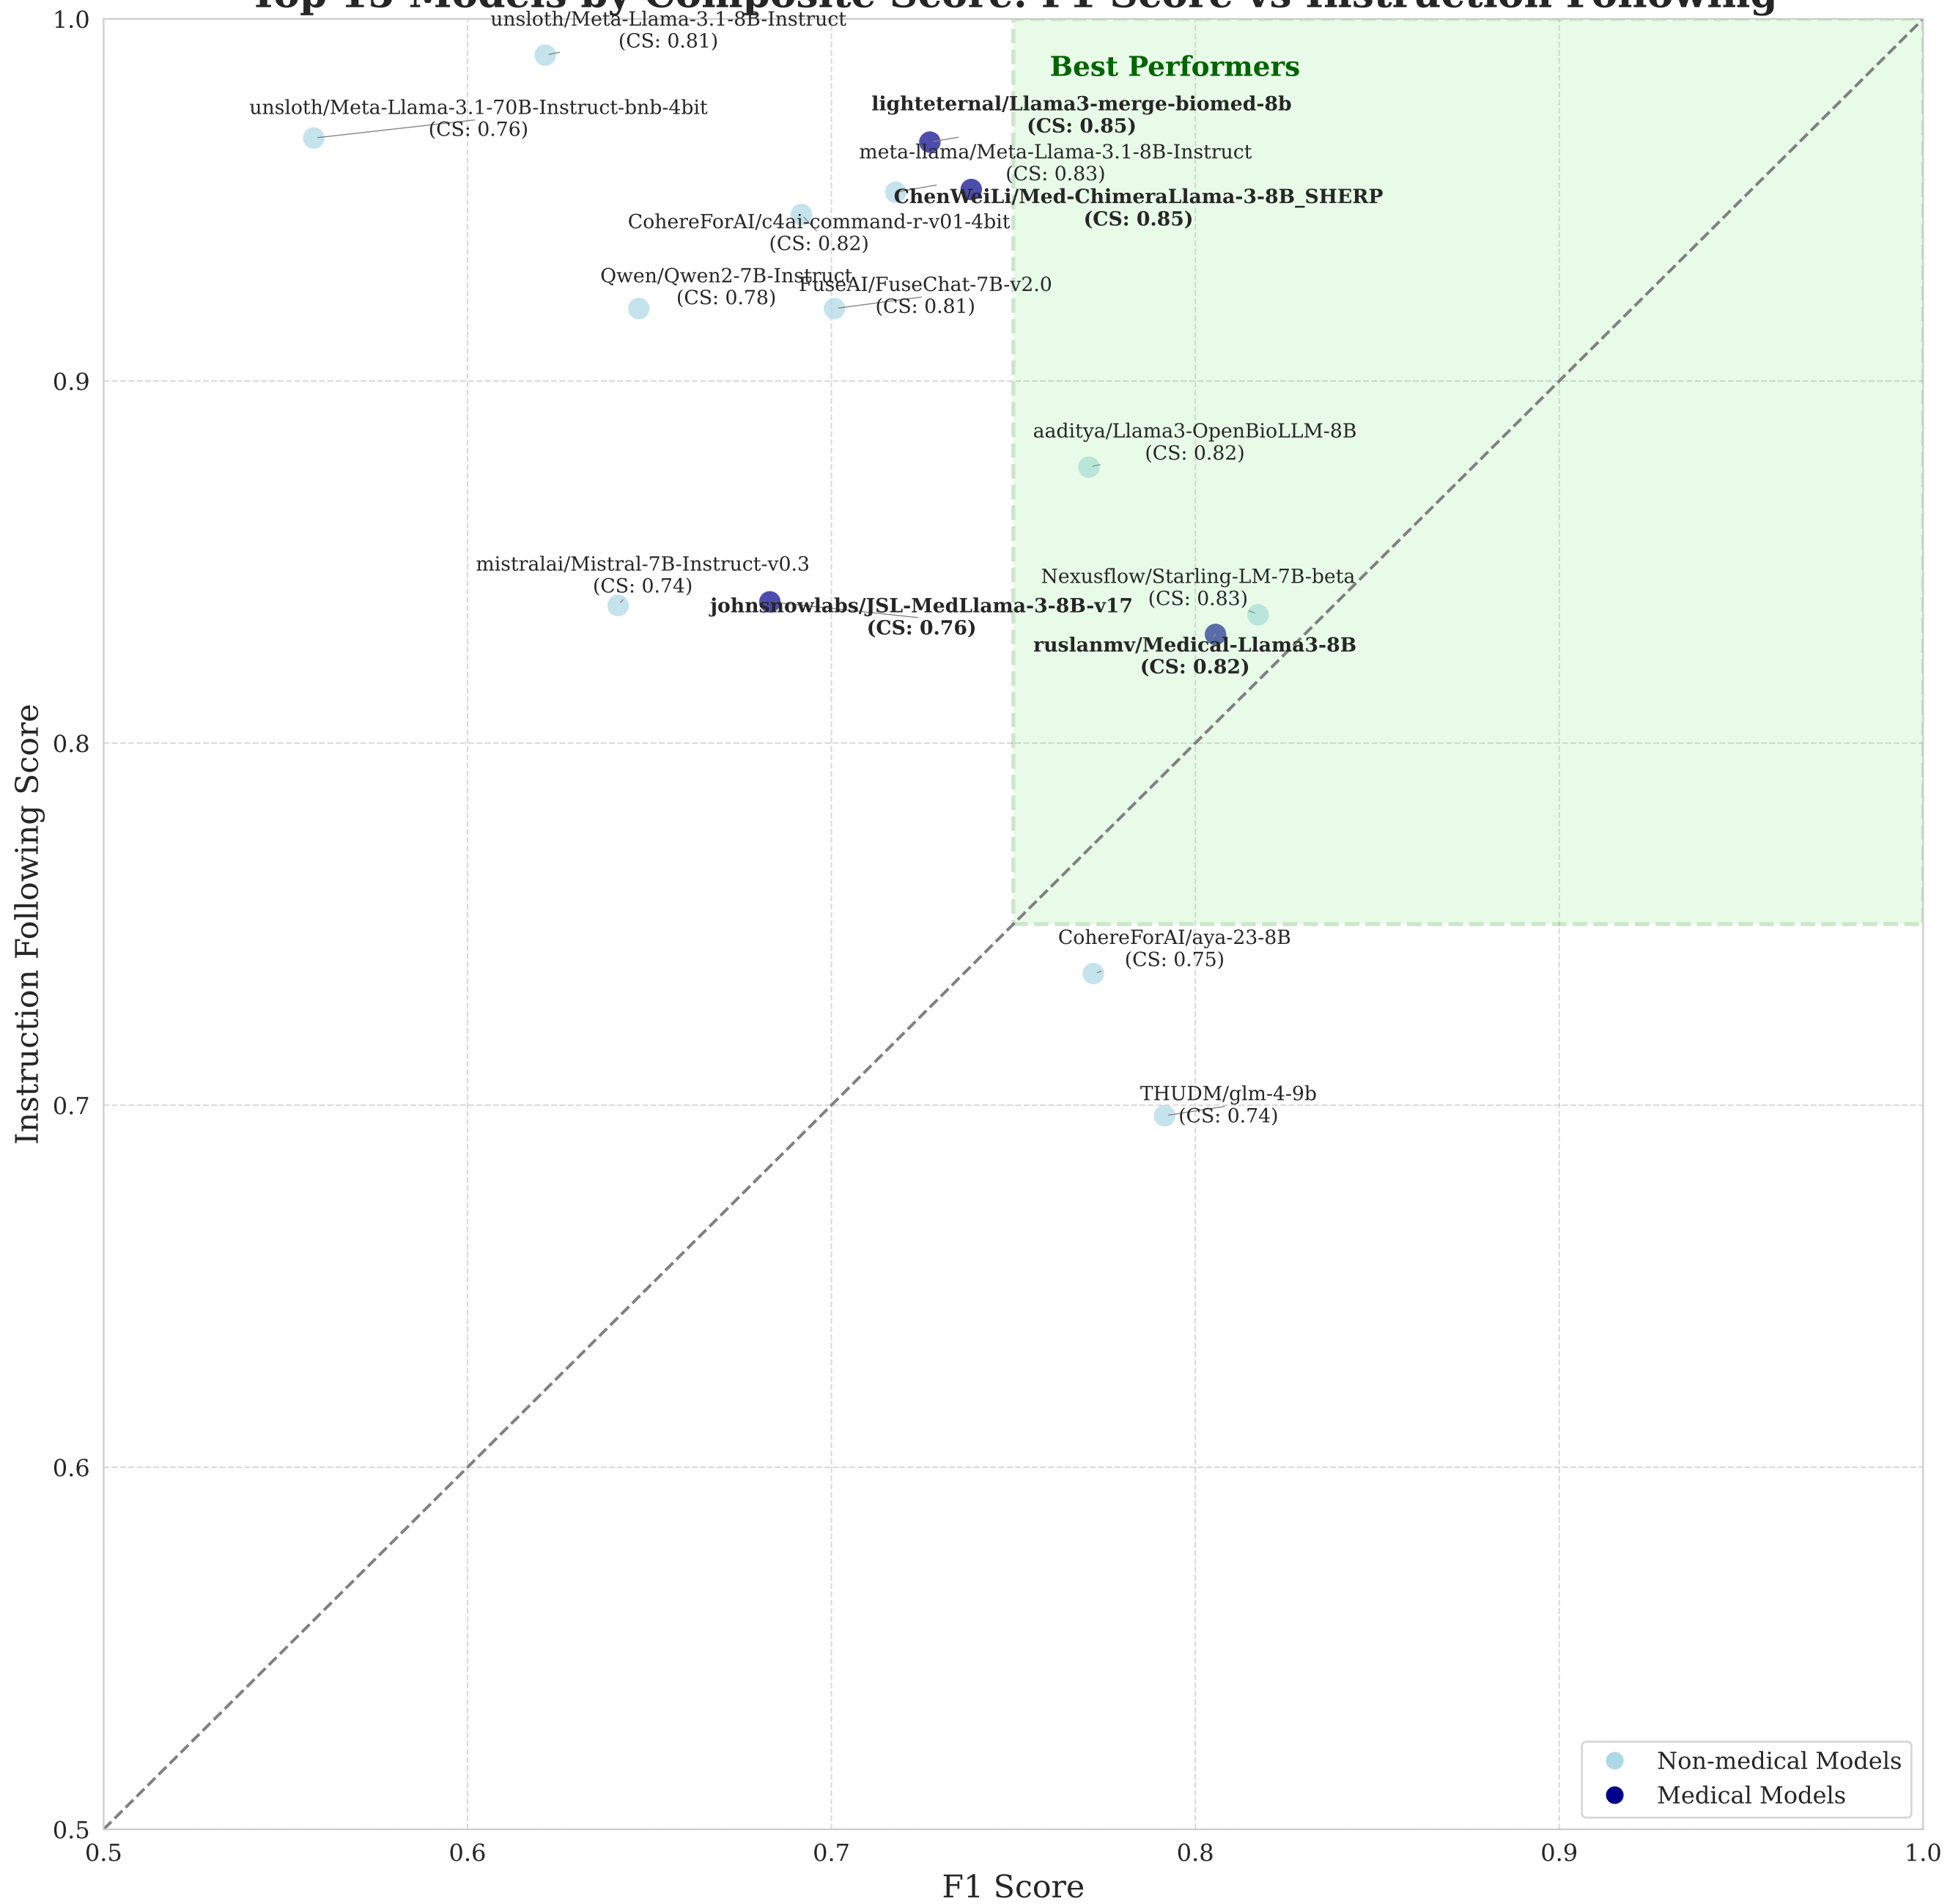

Supplement: supplementary_material [file attachment]
